# Supplementary material
Source: Research Square preprint supplement (doi:10.21203/rs.3.rs-9333780/v1)
Supplement: Supplementary file 1 [file 16a5573555ec2433b79b4d49.docx]

**Supplementary Materials**

*The Algorithmic Gaze: Platform Visibility and World Heritage Tourism on Xiaohongshu in Quanzhou, China*

**S1. Robustness: Quanzhou-Relevant Subsample**

A common concern in platform research is place ambiguity: keywords like "西街 [West Street]" or generic "非遗 [intangible heritage]" can occasionally retrieve posts from other cities or contexts. To address this, we implement a stricter Quanzhou-relevance flag that excludes the search keyword itself and relies on place cues in the title, description, tags, and (when available) location text (e.g., "泉州 [Quanzhou]," "鲤城 [Licheng]," "晋江 [Jinjiang]," "洛阳桥 [Luoyang Bridge]," "九日山 [Jiuri Mt.]," "开元寺 [Kaiyuan Temple]," "蟳埔/浔埔 [Xunpu]," "簪花围 [zanhuawei]"). In the cleaned stratified dataset, 594 of 660 records (90.0%) satisfy this stricter relevance criterion.

Key contrasts were re-estimated on this Quanzhou-relevant subsample. The headline result remains stable: at the Head stratum, A_visual retains an approximately eightfold visibility advantage over B_historical (geometric-mean ratio ≈ 8.23; 95% CI ≈ 3.51–20.64). Median-based estimates show a similar magnitude (median ratio ≈ 7.83; 95% CI ≈ 2.94–18.74). These robustness checks suggest that the core argument—an algorithmic visibility premium for photogenic, wearable, and template-oriented representations—is not an artifact of off-topic noise.

**S2. Robustness: Alternative Visibility Indicators and Confounds**

To address concerns that likes reflect audience preference, account scale, and timing rather than visibility per se, we re-estimated the headline A_visual vs B_historical Head contrast using alternative engagement signals available in the search export. The Head ratio remains similar when using log₁₀(Collects+1) (ratio ≈ 8.26; 95% CI 3.04–21.55) and when using a composite engagement index log₁₀(Likes+Collects+Comments+1) (ratio ≈ 8.28; 95% CI 3.45–19.80). Using log₁₀(Comments+1) yields a smaller but still positive contrast (ratio ≈ 3.86; 95% CI 2.03–7.96).

Adjusting for note age using log₁₀((Likes+1)/(AgeDays+1)) yields a comparable Head contrast (ratio ≈ 8.89; 95% CI 3.98–20.47). A simple OLS specification that controls for note age, media format (has_video, n_images), and a guide-genre proxy in text (攻略 [guide]/路线 [route]/机位 [camera spot]/避雷 [avoid pitfalls]/合集 [compilation]/一日游 [day trip]) also produces a similar A/B Head ratio (≈ 7.50; 95% CI 3.34–18.73).

To address dependence from repeated notes across keywords, we additionally constructed a note-level de-duplicated dataset by keeping each note’s best (highest) rank across all keywords. The Head A/B ratio remains large (≈ 7.66; 95% CI 3.41–17.95).

**S3. Robustness: Time Replication**

We repeated the same keyword-set search export on January 29, January 30, and March 1, 2026 and recomputed the Head contrast using the top 10 ranks per keyword. The estimated ratios are ≈ 6.93 (95% CI 3.01–15.79) for 2026-01-29, ≈ 9.27 (95% CI 3.82–22.71) for 2026-01-30, and ≈ 7.36 (95% CI 3.43–16.03) for 2026-03-01, with overlapping CIs. The key Head visibility premium for A_visual persists across snapshots. The March 1 snapshot uses the completed 22-keyword export; rerunning the replication on the completed file leaves the substantive conclusion unchanged.

**S4. Table 1: Keyword Groups and Constituent Search Terms**

Group A (A_visual; influencer/photogenic traffic): "泉州拍照 [Quanzhou photography]," "泉州出片 [photogenic]," "泉州今生簪花 [zanhuawei experience]," "簪花围 [zanhuawei]," "泉州西街机位 [West St. camera spots]," "小西埕 [Xiao Xicheng]," "泉州氛围感 [vibe]."

Group B (B_historical; official/historical heritage): "泉州世遗 [World Heritage]," "泉州宋元中国 [Song-Yuan China]," "泉州海外交通史 [maritime trade history]," "九日山祈风石刻 [Jiuri Mt. inscriptions]," "伊斯兰教圣墓 [Islamic Holy Tombs]," "摩尼教草庵 [Manichaean Cao’an]," "洛阳桥 [Luoyang Bridge]."

Group C (C_test; benchmark terms): "泉州开元寺 [Kaiyuan Temple]," "泉州非遗 [intangible heritage]."

Group D (D_intangible; performing arts / intangible heritage): "泉州南音 [Nan Yin]," "泉州提线木偶 [marionette puppetry]," "泉州梨园戏 [Liyuan opera]."

Group E (E_critical; critical/crowding): "泉州避雷 [avoid pitfalls]," "泉州西街人挤人 [West St. overcrowding]," "泉州商业化 [commercialisation]."
